# Supplementary material for: A Ni-MOF derived graphene oxide combined Ni3S2–Ni/C composite and its use in the separator coating for lithium sulfur batteries
Source: Royal Society of Chemistry journal article supplement (doi:10.1039/d2cp05580e), 2023-01-01
Supplement: d2cp05580e1.pdf [file d2cp05580e1.pdf]

## Ni-MOF derived Graphene Oxide coated Ni<sub>3</sub>S<sub>2</sub>-Ni/C composite and its use in separator coating for lithium sulfur battery

Xinye Qian<sup>1</sup>, Jian Cheng<sup>1</sup>, Yuhe Wang<sup>1</sup>, Lina Jin<sup>1\*</sup>, Jianyu Chen<sup>1</sup>, Qingyuan Hao<sup>1</sup>,  
Ke Zhang<sup>1</sup>

<sup>1</sup> Institute for Advanced Materials, College of Materials Science and Engineering, Jiangsu  
University, Zhenjiang 212013, P. R. China.

\*Email: [jinln@ujs.edu.cn](mailto:jinln@ujs.edu.cn)

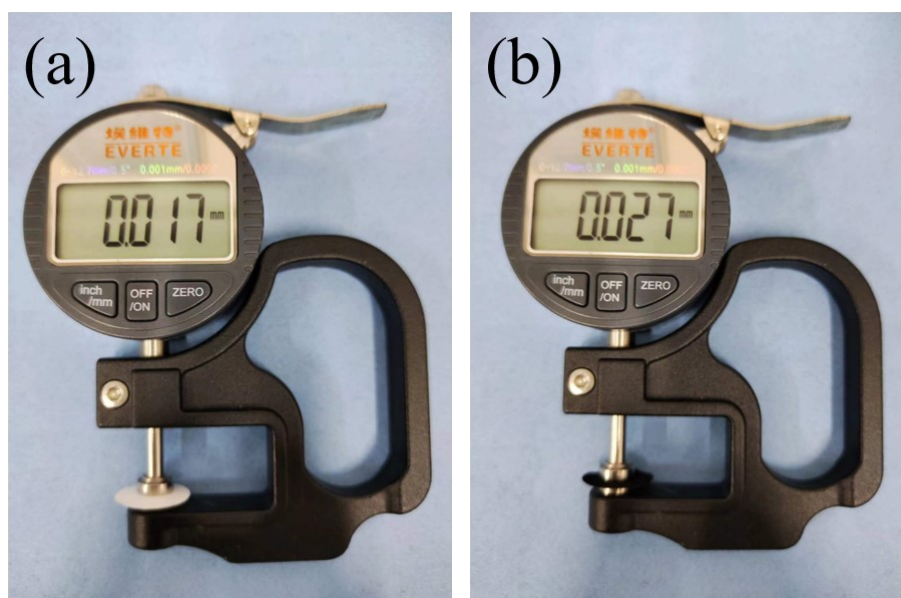

Figure S1. Photos of different diaphragm thickness.

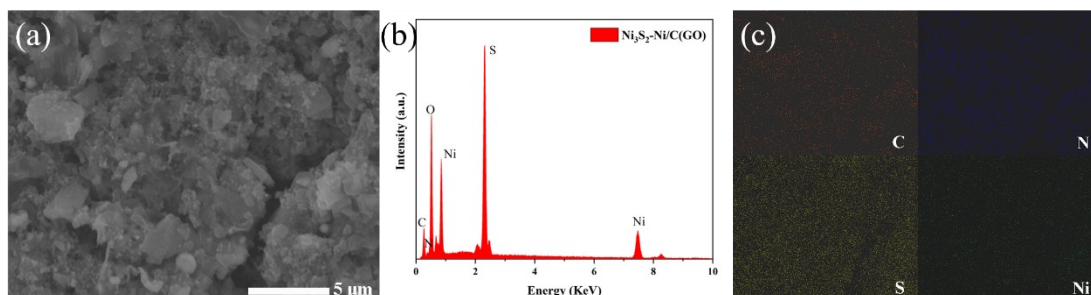

Figure S2. (a) The SEM diagram of Ni<sub>3</sub>S<sub>2</sub>-Ni/C (GO) after the loop. (b) The EDS diagram of Ni<sub>3</sub>S<sub>2</sub>-Ni/C (GO) after the loop. (c) Distribution map of each element.

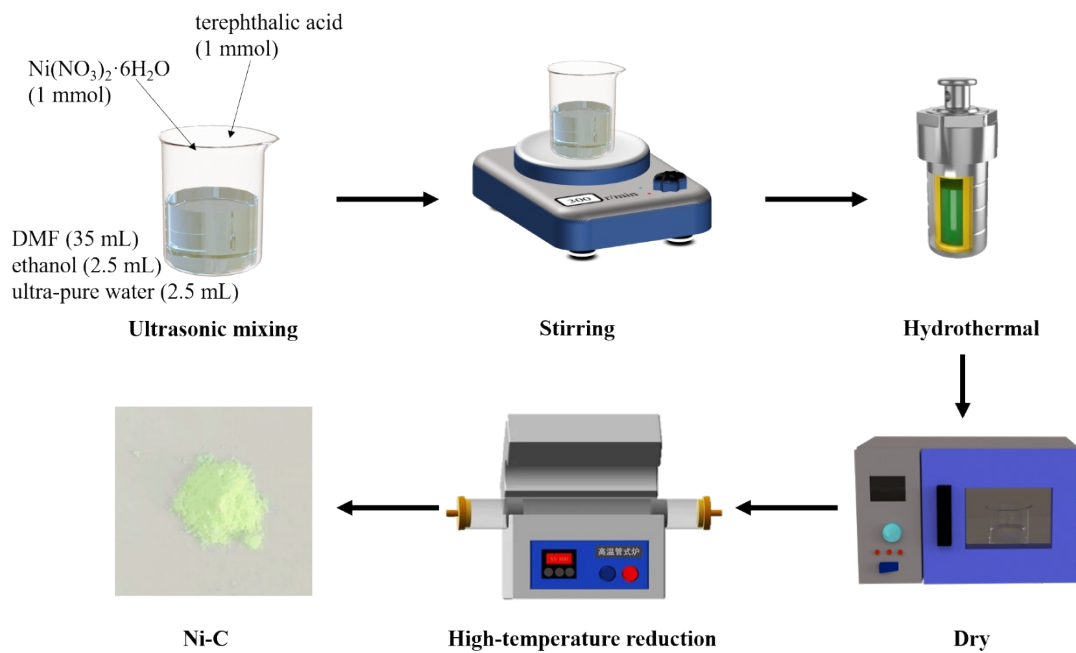

Figure S3. Preparation flow chart of Ni-C.

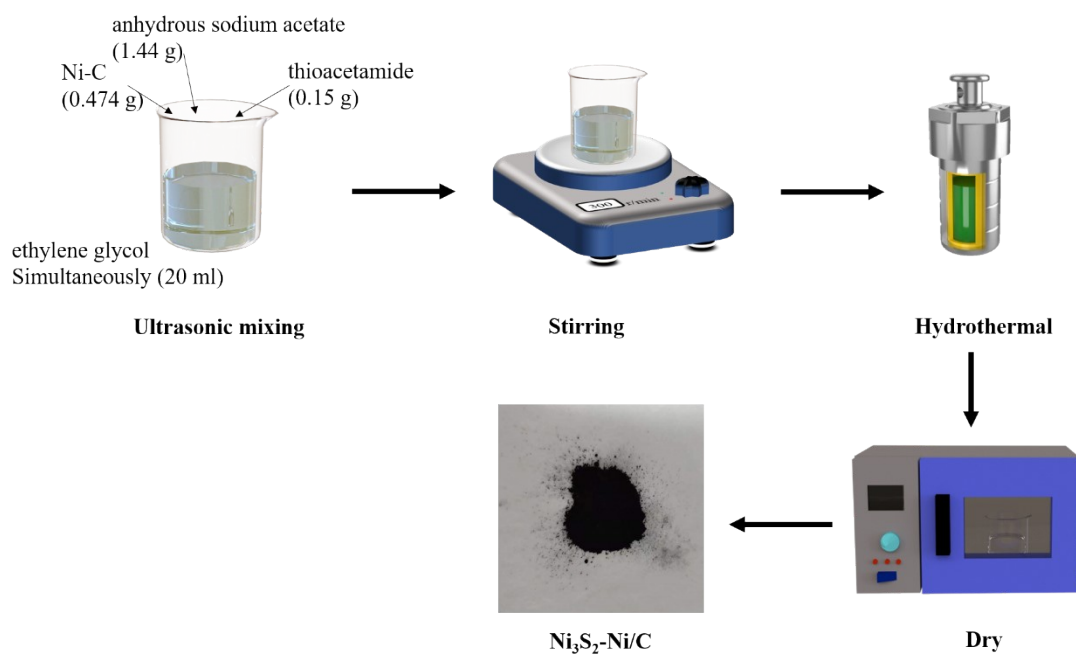

Figure S4. Flow chart of vulcanization of Ni-C into  $\text{Ni}_3\text{S}_2\text{-Ni/C}$  composites.
